# Supplementary material for: Generative Artificial Intelligence in Secondary STEM Education in the Light of Human Flourishing: A Scoping Literature Review
Source: Research Square preprint supplement (doi:10.21203/rs.3.rs-6923010/v1), 2025-07-02
Supplement: Supplementary file 1 [file ba98e061d2a63e6f7447e698.pdf]

# Coding Scheme for “Generative Artificial Intelligence in Secondary STEM Education in the Light of Human Flourishing: A Scoping Literature Review”

## General Information

### Publication Type

| Code     | Category   | Short description                                                                                            |
|----------|------------|--------------------------------------------------------------------------------------------------------------|
| <b>J</b> | Journal    | Publication published in a journal                                                                           |
| <b>C</b> | Conference | Publication published in a conference proceeding or presented at a conference and published elsewhere online |
| <b>P</b> | Preprint   | Publication not yet published, but available online                                                          |

Publication type is coded at the time of full-text reading, i.e. publications might have been retrieved as preprints initially, but are coded as J or C here.

### Journal/Conference Type

Only applicable for J and C

| Code     | Category                              | Short description                                                                                                                                                                                                                                                                                        |
|----------|---------------------------------------|----------------------------------------------------------------------------------------------------------------------------------------------------------------------------------------------------------------------------------------------------------------------------------------------------------|
| <b>1</b> | Education in one STEM discipline      | Journal/conference focusses on education in one STEM disciplines (e.g. <i>Journal of Mathematics Education</i> ).                                                                                                                                                                                        |
| <b>2</b> | Education in several STEM disciplines | Journal/conference focusses on education in several STEM disciplines, including journals and conferences on science education (e.g. <i>Science Teacher</i> )                                                                                                                                             |
| <b>3</b> | Education in general                  | Journal/conference focusses on education in general (e.g. <i>Frontiers in Education</i> )                                                                                                                                                                                                                |
| <b>4</b> | Education & Technology                | Journal/conference focusses on education in conjunction with technology (e.g. <i>International Journal of Artificial Intelligence in Education</i> )<br>If journals/conferences focus on one or several STEM disciplines in conjunction with technology, do not code here, but code 1 or 2 respectively. |
| <b>5</b> | Technology                            | Journal/conference focusses on technology, including Human-Computer-Interaction (e.g. <i>Informatics</i> ).                                                                                                                                                                                              |
| <b>6</b> | Other                                 |                                                                                                                                                                                                                                                                                                          |

### Countries of Authors

The country of each author of a publication is coded.

### Month/Year

For journal publications, month and year of (online) publication are coded. For conference publications, month and year of the conference are coded. For preprints, month and year of the last update on a preprint publishing website (mostly ArXiv) is coded.

## **Methodology**

### **Publication Type and Research Method**

| <b>Code</b> | <b>Category</b>      |                       | <b>Short description</b>                                                                                                                                                   |
|-------------|----------------------|-----------------------|----------------------------------------------------------------------------------------------------------------------------------------------------------------------------|
| <b>1</b>    | Original Research    |                       | Publication includes collection and analysis of data with the methodology outlined in the publication.                                                                     |
|             | <b>1a</b>            | qualitative           | Publication uses qualitative methods.                                                                                                                                      |
|             | <b>1b</b>            | quantitative          | Publication uses quantitative methods.                                                                                                                                     |
|             | <b>1c</b>            | mixed or multi-method | Publication uses both qualitative and quantitative methods.                                                                                                                |
| <b>2</b>    | Theoretical analysis |                       | Publication elaborates on a theoretical or philosophical argument.                                                                                                         |
| <b>3</b>    | Review               |                       | Publication reviews (and synthesizes) existing research.                                                                                                                   |
| <b>4</b>    | Editorial            |                       | Publication denoted as editorial                                                                                                                                           |
| <b>5</b>    | Position Paper       |                       | Publication denoted as position paper                                                                                                                                      |
| <b>6</b>    | Report               |                       | Publication reports on the development of a generative AI tool or on the implementation of a teaching unit without a systematic methodology, data collection and analysis. |

### **Data Source**

| <b>Code</b> | <b>Category</b>       | <b>Short description</b>                                                                                                   |
|-------------|-----------------------|----------------------------------------------------------------------------------------------------------------------------|
| <b>1</b>    | Survey                | Publication collects data through a survey.                                                                                |
| <b>2</b>    | Interview             | Publication collects data through interviews or group discussions.                                                         |
| <b>3</b>    | Questionnaire         | Publication collects data through a questionnaire.                                                                         |
| <b>4</b>    | AI-generated content  | Publication collects data from AI-generated content.                                                                       |
| <b>5</b>    | Test                  | Publication collects data through a test.                                                                                  |
| <b>6</b>    | Observation           | Publication collects data through observations.                                                                            |
| <b>7</b>    | Audio/Video Recording | Publication collects data through audio or video recordings.                                                               |
| <b>8</b>    | Student work          | Publication collects data through student work (e.g., prompts, reflection diaries, filled out worksheets).                 |
| <b>9</b>    | Log data              | Publication collects data through interaction logs.<br>Only quantitative log data is coded here; Chatlogs are coded as 4+8 |
| <b>10</b>   | measurements          | Publication collects data through other measurements.                                                                      |

### **Participants**

| <b>Code</b> | <b>Category</b>      | <b>Short description</b>                                   |
|-------------|----------------------|------------------------------------------------------------|
| <b>1</b>    | Students             | Publication involves students as participants.             |
| <b>2</b>    | Teachers             | Publication involves teachers as participants.             |
| <b>3</b>    | Pre-service teachers | Publication involves pre-service teachers as participants. |
| <b>4</b>    | other humans         | Publication involves other participants (e.g., parents).   |
| <b>5</b>    | no humans            | Publication does not involve human participants.           |

## **Other**

### **Discipline**

| <b>Code</b> | <b>Category</b> | <b>Short description</b>                                                                                                                                                                |
|-------------|-----------------|-----------------------------------------------------------------------------------------------------------------------------------------------------------------------------------------|
| <b>S</b>    | Science         | Publication focusses on science education without mentioning a specific science domain (e.g. physics).                                                                                  |
| <b>B</b>    | Biology         | Publication focusses on biology education.                                                                                                                                              |
| <b>C</b>    | Chemistry       | Publication focusses on chemistry education.                                                                                                                                            |
| <b>P</b>    | Physics         | Publication focusses on physics education.                                                                                                                                              |
| <b>ES</b>   | Earth Science   | Publication focusses on earth science education.                                                                                                                                        |
| <b>T</b>    | Technology      | Publication focusses on technology education, including computer science education.                                                                                                     |
| <b>E</b>    | Engineering     | Publication focusses on engineering education.                                                                                                                                          |
| <b>M</b>    | Mathematics     | Publication focusses on mathematics education.                                                                                                                                          |
| <b>STEM</b> | STEM            | Publication focusses on STEM education with no further specification of disciplines.<br>If a contribution focusses on, e.g. mathematics and physics, do not code here, but code M and P |

### **AI Tool**

| <b>Code</b> | <b>Category</b>      | <b>Short description</b>                                                                                          |
|-------------|----------------------|-------------------------------------------------------------------------------------------------------------------|
| <b>1</b>    | Standard AI Tool     | Publication uses a publicly available, standard AI tool (e.g. ChatGPT) or does not refer to a particular AI tool. |
| <b>2</b>    | Non-standard AI tool | Publication uses a fine-tuned or self-developed AI tool or a tool using retrieval augmented generation (RAG).     |

## **Research Directions**

| <b>Code</b> | <b>Category</b>                                                        | <b>Short description</b>                                                                                                                                                                                                                                                                                                                                                             |
|-------------|------------------------------------------------------------------------|--------------------------------------------------------------------------------------------------------------------------------------------------------------------------------------------------------------------------------------------------------------------------------------------------------------------------------------------------------------------------------------|
| <b>1</b>    | Theoretical frameworks                                                 | Publication develops and/or analyzes theoretical frameworks regarding generative AI in STEM education.                                                                                                                                                                                                                                                                               |
| <b>2</b>    | Evolution, future directions & trends and philosophical considerations | Publication explores the development of generative AI in STEM education so far or addresses future trends, prospects and directions or philosophical issues.                                                                                                                                                                                                                         |
| <b>3</b>    | Pros & cons                                                            | Publication analyzes different pros and/or cons, i.e. potentials and/or challenges, of generative AI in STEM education or within a particular aspect of STEM education from the perspective of research (i.e., not teacher or student perspectives on pros and cons).                                                                                                                |
| <b>4</b>    | Tool development                                                       | Publication develops and possibly tests/evaluates a generative AI system, algorithms/technical approaches, or a STEM educational dataset or fine-tunes an existing generative AI system for STEM education. This may include testing with human participants, but only for the sake of evaluating the tool.                                                                          |
| <b>5</b>    | Performance                                                            | Publication evaluates the performance of a publicly available generative AI system for STEM teaching and learning purposes. There may be implications drawn for the application of generative AI in STEM teaching and learning settings, but they are based on the performance evaluation and not on the interaction of participants (i.e., students, teachers, PSTs) with the tool. |
| <b>6</b>    | Ethical considerations & academic integrity                            | Publication investigates ethical issues of generative AI in STEM education or potential threats of generative AI to academic integrity, including the presentation of theoretical guidelines.                                                                                                                                                                                        |
| <b>7</b>    | Awareness, attitude & acceptance                                       | Publication explores teachers' and students' awareness and acceptance of generative AI in STEM education as well as their attitudes towards generative AI in STEM education.                                                                                                                                                                                                         |
| <b>8</b>    | Application & impact                                                   | Publication explores and elaborates on one or more applications of generative AI for teaching and learning in STEM classrooms as well as their impact on various factors, including changes in teacher roles, learning outcomes and students' perceptions of a concrete application.                                                                                                 |
| <b>9</b>    | Educational research                                                   | Publication explores possibilities to use generative AI in research on STEM education, e.g., for data analysis.                                                                                                                                                                                                                                                                      |

## **SWOT Analysis**

| <b>Category</b> | <b>Short description</b>                                                                                                                                           |
|-----------------|--------------------------------------------------------------------------------------------------------------------------------------------------------------------|
| Strength        | Property of generative AI systems that is conducive to the teaching and/or learning of the respective STEM discipline(s) in secondary education                    |
| Weakness        | Property of generative AI systems that is obstructive to the teaching and/or learning of the respective STEM discipline(s) in secondary education                  |
| Opportunity     | Influence of generative AI systems on teachers and students that fosters the teaching and/or learning of the respective STEM discipline(s) in secondary education  |
| Threat          | Influence of generative AI systems on teachers and students that inhibits the teaching and/or learning of the respective STEM discipline(s) in secondary education |
